# Supplementary material for: Combined fluvial and pluvial urban flood hazard analysis: concept development and application to Can Tho city, Mekong Delta, Vietnam
Source: Copernicus journal article supplement (doi:10.5194/nhess-16-941-2016), 2016-04-13
Supplement: Supplementary file 1 [file nhess-16-941-2016-supplement.zip]

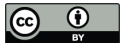

## *Supplement of*

# **Combined fluvial and pluvial urban flood hazard analysis: concept development and application to Can Tho city, Mekong Delta, Vietnam**

**H. Apel et al.**

*Correspondence to:* Heiko Apel ([heiko.apel@gfz-potsdam.de](mailto:heiko.apel@gfz-potsdam.de))

- nhess-16-941-2016-supplement-title-page.pdf
- fluvial
  - ProbHazMap\_CanTho\_fluvial\_plevel05\_percentile5.tif
  - ProbHazMap\_CanTho\_fluvial\_plevel05\_percentile50.tif
  - ProbHazMap\_CanTho\_fluvial\_plevel05\_percentile95.tif
  - ProbHazMap\_CanTho\_fluvial\_plevel08\_percentile5.tif
  - ProbHazMap\_CanTho\_fluvial\_plevel08\_percentile50.tif
  - ProbHazMap\_CanTho\_fluvial\_plevel08\_percentile95.tif
  - ProbHazMap\_CanTho\_fluvial\_plevel095\_percentile5.tif
  - ProbHazMap\_CanTho\_fluvial\_plevel095\_percentile50.tif
  - ProbHazMap\_CanTho\_fluvial\_plevel095\_percentile95.tif
  - ProbHazMap\_CanTho\_fluvial\_plevel098\_percentile5.tif
  - ProbHazMap\_CanTho\_fluvial\_plevel098\_percentile50.tif
  - ProbHazMap\_CanTho\_fluvial\_plevel098\_percentile95.tif
  - ProbHazMap\_CanTho\_fluvial\_plevel099\_percentile5.tif
  - ProbHazMap\_CanTho\_fluvial\_plevel099\_percentile50.tif
  - ProbHazMap\_CanTho\_fluvial\_plevel099\_percentile95.tif
  - ProbHazMap\_CanTho\_fluvial\_plevel09\_percentile5.tif
  - ProbHazMap\_CanTho\_fluvial\_plevel09\_percentile50.tif
  - ProbHazMap\_CanTho\_fluvial\_plevel09\_percentile95.tif
- fluvialpluvial
  - ProbHazMap\_CanTho\_fluvialpluvial\_plevel05\_percentile5.tif
  - ProbHazMap\_CanTho\_fluvialpluvial\_plevel05\_percentile50.tif

- ProbHazMap\_CanTho\_fluvialpluvial\_plevel05\_percentile95.tif
- ProbHazMap\_CanTho\_fluvialpluvial\_plevel08\_percentile5.tif
- ProbHazMap\_CanTho\_fluvialpluvial\_plevel08\_percentile50.tif
- ProbHazMap\_CanTho\_fluvialpluvial\_plevel08\_percentile95.tif
- ProbHazMap\_CanTho\_fluvialpluvial\_plevel095\_percentile5.tif
- ProbHazMap\_CanTho\_fluvialpluvial\_plevel095\_percentile50.tif
- ProbHazMap\_CanTho\_fluvialpluvial\_plevel095\_percentile95.tif
- ProbHazMap\_CanTho\_fluvialpluvial\_plevel098\_percentile5.tif
- ProbHazMap\_CanTho\_fluvialpluvial\_plevel098\_percentile50.tif
- ProbHazMap\_CanTho\_fluvialpluvial\_plevel098\_percentile95.tif
- ProbHazMap\_CanTho\_fluvialpluvial\_plevel099\_percentile5.tif
- ProbHazMap\_CanTho\_fluvialpluvial\_plevel099\_percentile50.tif
- ProbHazMap\_CanTho\_fluvialpluvial\_plevel099\_percentile95.tif
- ProbHazMap\_CanTho\_fluvialpluvial\_plevel09\_percentile5.tif
- ProbHazMap\_CanTho\_fluvialpluvial\_plevel09\_percentile50.tif
- ProbHazMap\_CanTho\_fluvialpluvial\_plevel09\_percentile95.tif

- pluvial

- ProbHazMap\_CanTho\_pluvial\_plevel05\_percentile5.tif
- ProbHazMap\_CanTho\_pluvial\_plevel05\_percentile50.tif
- ProbHazMap\_CanTho\_pluvial\_plevel05\_percentile95.tif
- ProbHazMap\_CanTho\_pluvial\_plevel08\_percentile5.tif
- ProbHazMap\_CanTho\_pluvial\_plevel08\_percentile50.tif
- ProbHazMap\_CanTho\_pluvial\_plevel08\_percentile95.tif
- ProbHazMap\_CanTho\_pluvial\_plevel095\_percentile5.tif
- ProbHazMap\_CanTho\_pluvial\_plevel095\_percentile50.tif
- ProbHazMap\_CanTho\_pluvial\_plevel095\_percentile95.tif
- ProbHazMap\_CanTho\_pluvial\_plevel098\_percentile5.tif
- ProbHazMap\_CanTho\_pluvial\_plevel098\_percentile50.tif
- ProbHazMap\_CanTho\_pluvial\_plevel098\_percentile95.tif
- ProbHazMap\_CanTho\_pluvial\_plevel099\_percentile5.tif
- ProbHazMap\_CanTho\_pluvial\_plevel099\_percentile50.tif
- ProbHazMap\_CanTho\_pluvial\_plevel099\_percentile95.tif
- ProbHazMap\_CanTho\_pluvial\_plevel09\_percentile5.tif
- ProbHazMap\_CanTho\_pluvial\_plevel09\_percentile50.tif
- ProbHazMap\_CanTho\_pluvial\_plevel09\_percentile95.tif

The copyright of individual parts of the supplement might differ from the CC-BY 3.0 licence.
